# Supplementary material
Source: ML conference proceedings conference paper supplement (https://openreview.net/forum?id=r4dzaP61QH)
Supplement: supplementary_material [file appendix.pdf › appendix.pdf]

## A Implementation Details

**Architecture.** In this section, we detail the architecture of the reconstructive model, predictive model, and render head. Both the reconstructive and predictive models share the same Transformer architecture, which includes recent techniques such as SwiGLU [5], RoPE [7], and QK Norm [2]. To handle the 3D triplane representations, we utilize rotary position encoding inspired by M-RoPE [8]. The feature dimensions are split into three parts, corresponding to the three spatial dimensions of the triplane (*i.e.*,  $x - y$ ,  $x - z$ , and  $y - z$  planes). For each dimension, we apply RoPE encoding separately, which allows the model to effectively learn relative positional relationships across the three triplane planes.

The render head takes the triplane features, interpolated according to the sampled points, as input and outputs the corresponding density, RGB values, and semantic features. The render head is implemented as two MLP layers with residual connections. Each layer consists of a linear layer, followed by layer normalization and a ReLU activation followed by a linear layer. This architecture enables efficient feature processing and representation learning for both the reconstruction and prediction tasks, with the same render head shared across both tasks.

Additionally, we follow GNFactor [9] by adopting a coarse-to-fine hierarchical structure for rendering. In the "fine" network, we apply depth-guided sampling to refine the predictions, improving the model's ability to reconstruct and predict scene features, especially at finer levels of detail.

| Hyperparameter              | Value                    |
|-----------------------------|--------------------------|
| triplane resolution         | $16 \times 16 \times 16$ |
| transformer depth           | 8                        |
| transformer width           | 768                      |
| attention heads             | 12                       |
| MLP ratio                   | 4.0                      |
| render head width           | 768                      |
| render head layers          | 2                        |
| batch size                  | 256                      |
| ray batch size              | 32                       |
| optimizer                   | AdamW                    |
| learning rate               | 0.0001                   |
| coarse sampled points       | 128                      |
| fine depth sampled points   | 64                       |
| fine uniform sampled points | 64                       |
| $\lambda_{pred}$            | 1.0                      |
| $\lambda_{recon}$           | 1.0                      |
| $\lambda_{rgb}$             | 1.0                      |
| $\lambda_{sem}$             | 0.1                      |
| $\lambda_{depth}$           | 0.01                     |

Table A: Hyperparameters.

**Target view augmentation.** In real-world setups, the limited and often fixed camera viewpoints pose a challenge for rendering-based pretraining. To address this limitation, we leverage a pre-trained visual-conditioned multi-view diffusion model to generate novel target views as additional supervision. Specifically, we utilize See3D [3], a large-scale pretrained multi-view video diffusion model.

Given input RGB-D images for a target frame, we first reconstruct the scene's point cloud. We then select an input viewpoint as the base view, from which we sample a new viewpoint with a random angular offset on a sphere surrounding the center of the scene. The angular offset is restricted within a maximum range of  $\pm 30$  degrees, as we observe that the quality of the synthesized novel view images decreases as the offset angle becomes larger. We generate a camera trajectory consisting of 25 frames, where each frame corresponds to a camera pose interpolated between the original and new viewpoints. We then use point cloud rendering to project the reconstructed point cloud onto each frame of the trajectory, producing warped images and corresponding masks. These warped images and masks, along with the original view, are fed into See3D, which generates high-fidelity novel-view images. Due to the time required for generating these trajectories, we augment only the keyframe viewpoints. For each keyframe, we randomly sample four distinct camera trajectories, generating a total of 100 novel view images per keyframe. In both simulation and real-world experiments, we maintain fixed camera setups and viewpoints, with the view augmentation process described above applied consistently.

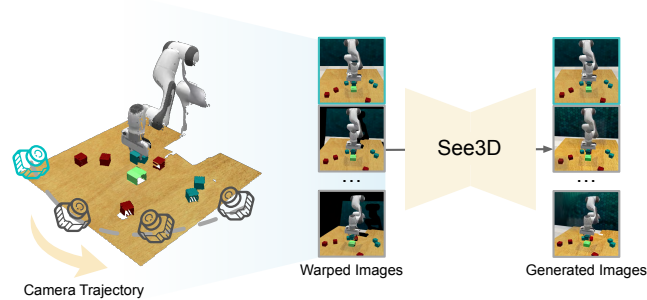

Figure A: Target view augmentation pipeline.

**Hyperparameters.** We present the hyperparameters used in DynaRend as shown in Tab. A.

## 55 B Simulation Experiment Details

56 **RLBench-18.** For the 18-task setting, we follow PerAct [6] and select 18 RLBench tasks that  
 57 involve at least two or more variations in object types, spatial arrangements, or instructions. This  
 58 curated subset is designed to evaluate the multi-task generalization capabilities of different agents  
 59 under diverse and realistic conditions. Detailed descriptions of each task can be found in Tab. B.

| Task             | Variation Type | # Variations | Avg. Keyframes | Language Template                                   |
|------------------|----------------|--------------|----------------|-----------------------------------------------------|
| open drawer      | placement      | 3            | 3.0            | "open the __ drawer"                                |
| slide block      | color          | 4            | 4.7            | "slide the block to __ target"                      |
| sweep to dustpan | size           | 2            | 4.6            | "sweep dirt to the __ dustpan"                      |
| meat off grill   | category       | 2            | 5.0            | "take the __ off the grill"                         |
| turn tap         | placement      | 2            | 2.0            | "turn __ tap"                                       |
| put in drawer    | placement      | 3            | 12.0           | "put the item in the __ drawer"                     |
| close jar        | color          | 20           | 6.0            | "close the __ jar"                                  |
| drag stick       | color          | 20           | 6.0            | "use the stick to drag the cube onto the __ target" |
| stack blocks     | color,count    | 60           | 14.6           | "stack __ blocks"                                   |
| screw bulb       | color          | 20           | 7.0            | "screw in the __ light bulb"                        |
| put in safe      | placement      | 3            | 5.0            | "put the money away in the safe on the __ shelf"    |
| place wine       | placement      | 3            | 5.0            | "stack the wine bottle to the __ of the rack"       |
| put in cupboard  | category       | 9            | 5.0            | "put the __ in the cupboard"                        |
| sort shape       | shape          | 5            | 5.0            | "put the __ in the shape sorter"                    |
| push buttons     | color          | 50           | 3.8            | "push the __ button, [then the __ button]"          |
| insert peg       | color          | 20           | 5.0            | "put the ring on the __ spoke"                      |
| stack cups       | color          | 20           | 10.0           | "stack the other cups on top of the __ cup"         |
| place cups       | count          | 3            | 11.5           | "place __ cups on the cup holder"                   |

Table B: Details on 18 RLBench tasks.

60 **RLBench-71.** For large-scale multi-task evaluation, we follow SPA [10] and divide all executable  
 61 tasks in RLBench into two groups, consisting of 35 and 36 tasks respectively. For each group, we  
 62 train a language-conditioned multi-task agent. All RVT-2 [1] baselines are implemented using the  
 63 same two-stage architecture, differing only in the choice of pretrained vision encoder. All other com-  
 64 ponents and training hyperparameters remain consistent with the original RVT-2 setup. Reported  
 65 results are taken directly from SPA [10].

66 The 35 tasks in Group 1 include: basketball in hoop, put rubbish in bin, meat off grill,  
 67 meat on grill, slide block to target, reach and drag, take frame off hanger, water  
 68 plants, hang frame on hanger, wipe desk, stack blocks, reach target, push button, lamp  
 69 on, toilet seat down, close laptop lid, open box, open drawer, pick up cup, turn tap,  
 70 take usb out of computer, play jenga, insert onto square peg, take umbrella out of  
 71 umbrella stand, insert usb in computer, straighten rope, turn oven on, change clock,  
 72 close microwave, close fridge, close grill, open grill, unplug charger, press switch,  
 73 take money out safe.

74 The 36 tasks in Group 2 include: The 36 tasks in Group 2 include: change channel, tv on, push  
 75 buttons, stack wine, scoop with spatula, place hanger on rack, move hanger, sweep to  
 76 dustpan, take plate off colored dish rack, screw nail, take shoes out of box, slide  
 77 cabinet open and place cups, lamp off, pick and lift, take lid off saucepan, close  
 78 drawer, close box, phone on base, toilet seat up, put books on bookshelf, beat the buzz,  
 79 stack cups, put knife on chopping board, place shape in shape sorter, take toilet  
 80 roll off stand, put umbrella in umbrella stand, setup checkers, open window, open  
 81 wine bottle, open microwave, put money in safe, open door, close door, open fridge,  
 82 open oven, plug charger in power supply.

83 **Colosseum.** Colosseum [4] is a recently proposed benchmark designed to evaluate the general-  
 84 ization capabilities of robotic manipulation policies under diverse domain shifts. It consists of 20  
 85 manipulation tasks drawn from the RLBench suite, including: basketball in hoop, close box,  
 86 close laptop lid, empty dishwasher, get ice from fridge, hockey, meat on grill, move  
 87 hanger, wipe desk, open drawer, slide block to target, reach and drag, put money in  
 88 safe, place wine at rack location, insert onto square peg, stack cups, turn oven on,  
 89 straighten rope, setup chess, scoop with spatula.

90 Colosseum defines 14 types of perturbation factors to simulate real-world domain shifts. In our  
 91 evaluation, we follow the standard setting and apply 12 of these perturbation factors to all 20 tasks

to systematically assess the robustness and generalization ability of learned policies under unseen conditions. The 12 perturbations can be categorized into three groups:

- **Manipulation Object (MO) Perturbation:** The manipulation object is the item directly manipulated by the robot, such as the wine bottle in place wine at rack location. Manipulation object perturbations include variations in color, texture, and size.
- **Receiver Object (RO) Perturbation:** The receiver object is task-relevant but not directly manipulated, such as the rack in the same task. Receiver object perturbations also include changes in color, texture, and size.
- **Background Perturbation:** These factors affect the overall scene without modifying task-relevant objects. They include changes to light color, table color, table texture, background texture, camera pose, and the addition of distractor objects.

Tab. C summarizes the applied perturbations for each task. For more implementation details and perturbation configurations, please refer to Colosseum [4].

| Variation                   | MO           | RO     | MO Color | MO Size     | MO Texture | RO Color | RO Size     | RO Texture | Object Mass |
|-----------------------------|--------------|--------|----------|-------------|------------|----------|-------------|------------|-------------|
|                             | -            | -      | discrete | continuous  | discrete   | discrete | continuous  | discrete   | continuous  |
| basketball in hoop          | ball         | hoop   | 20       | [0.75,1.25] | 213        | 20       | [0.75,1.15] | -          | -           |
| close box                   | box          | -      | 20       | [0.75,1.15] | -          | -        | -           | -          | -           |
| close laptop lid            | laptop       | -      | 20       | [0.75,1.00] | -          | -        | -           | -          | -           |
| empty dishwasher            | dishwasher   | plate  | 20       | [0.80,1.00] | -          | 20       | [0.80,1.00] | 213        | -           |
| get ice from fridge         | cup          | fridge | 20       | [0.75,1.25] | 213        | 20       | [0.75,1.00] | -          | -           |
| hockey                      | stick        | ball   | 20       | [0.95,1.05] | -          | 20       | [0.75,1.25] | 213        | [0.1,0.5]   |
| meat on grill               | meat         | grill  | 20       | [0.65,1.15] | -          | 20       | -           | -          | -           |
| move hanger                 | hanger       | pole   | 20       | -           | -          | 20       | -           | -          | -           |
| wipe desk                   | sponge       | beans  | 20       | [0.75,1.25] | 213        | 20       | -           | -          | [1.0,5.0]   |
| open drawer                 | drawer       | -      | 20       | [0.75,1.00] | -          | -        | -           | -          | -           |
| slide block to target       | block        | -      | 20       | -           | 213        | -        | -           | -          | [1.0,15.0]  |
| reach and drag              | stick        | block  | 20       | [0.80,1.10] | 213        | 20       | [0.50,1.00] | 213        | [0.5,2.5]   |
| put money in safe           | money        | safe   | 20       | [0.50,1.00] | 213        | 20       | -           | 213        | -           |
| place wine at rack location | bottle       | shelve | 20       | [0.85,1.15] | -          | 20       | [0.85,1.15] | 213        | -           |
| insert onto square peg      | peg          | spokes | 20       | [1.00,1.50] | -          | 20       | [0.85,1.15] | 213        | -           |
| stack cups                  | cups         | -      | 20       | [0.75,1.25] | 213        | -        | -           | -          | -           |
| turn oven on                | knobs        | -      | 20       | [0.50,1.50] | -          | -        | -           | -          | -           |
| straighten rope             | rope         | -      | 20       | -           | 213        | -        | -           | -          | -           |
| setup chess                 | chess pieces | board  | 20       | [0.75,1.25] | 213        | 20       | -           | -          | -           |
| scoop with spatula          | spatula      | block  | 20       | [0.75,1.25] | 213        | 20       | [0.75,1.50] | 213        | [1.0,5.0]   |

Table C: Summary of tasks and their perturbation factors. For more details, check Colosseum [4].

## C Real-world Experiment Details

**Hardware Setup.** For the hardware setup, we use a Franka Research 3 robot arm equipped with a parallel gripper. Visual input is provided by two Orbbec Femto Bolt RGB-D cameras, positioned on either side of the robot arm. The cameras are calibrated using the `kalibr` package to determine the extrinsics between them, while `easy_handeye` package is used to calibrate the extrinsics between the camera and the robot base-frame. The cameras provide RGB-D images at a resolution of 1280x720 at 30Hz. To prepare the images for model input, we resize the shortest edge to 256 and crop them to a resolution of 256x256.

| Task               | Variation Type | # Variations | Avg. Keyframes | Language Template                   |
|--------------------|----------------|--------------|----------------|-------------------------------------|
| stack cups         | color          | 5            | 11.5           | "stack __ cups on __ cup"           |
| stack blocks       | color          | 5            | 12.1           | "stack __ blocks on __ block"       |
| sort shape         | placement      | 1            | 5.4            | "put yellow circle in shape sorter" |
| close pot          | placement      | 1            | 5.7            | "put lid on pot"                    |
| put item in drawer | category       | 4            | 8.3            | "put __ in drawer"                  |

Table D: Details on 5 real-world tasks.

**Data Collection.** The real-world dataset is collected through human demonstrations. Specifically, for each task and scenario, a human demonstrator kinesthetically moves the robot arm to specify a series of end-effector poses. Afterward, the robot arm is reset to its initial position, and the demonstrator sequentially moves it to the specified poses. During this process, the camera streams and

| Task Name                   | No Variations | MO Color | RO Color | MO Texture | RO Texture | MO Size | RO Size | Light Color | Table Color | Table Texture | Distractor | Background Texture | Camera Pose |
|-----------------------------|---------------|----------|----------|------------|------------|---------|---------|-------------|-------------|---------------|------------|--------------------|-------------|
| basketball in hoop          | 100           | 96       | 100      | 96         | -          | 100     | 100     | 100         | 100         | 100           | 40         | 100                | 100         |
| close box                   | 96            | 84       | -        | -          | -          | 92      | -       | 92          | 88          | 88            | 88         | 96                 | 88          |
| close laptop lid            | 100           | 100      | -        | -          | -          | 0       | -       | 100         | 100         | 96            | 68         | 100                | 96          |
| empty dishwasher            | 0             | 0        | 0        | -          | 0          | 0       | 0       | 0           | 0           | 0             | 0          | 0                  | 0           |
| get ice from fridge         | 92            | 88       | 96       | 88         | -          | 80      | 72      | 96          | 100         | 96            | 64         | 92                 | 100         |
| hockey                      | 32            | 36       | 36       | -          | 20         | 44      | 32      | 28          | 36          | 20            | 28         | 28                 | 32          |
| meat on grill               | 96            | 100      | 100      | -          | -          | 100     | -       | 100         | 100         | 100           | 96         | 96                 | 100         |
| move hanger                 | 0             | 0        | 0        | -          | -          | -       | -       | 0           | 0           | 0             | 8          | 0                  | 0           |
| wipe desk                   | 0             | 0        | -        | 0          | -          | 0       | -       | 0           | 0           | 0             | 0          | 0                  | 0           |
| open drawer                 | 84            | 68       | -        | -          | -          | 68      | -       | 68          | 72          | 60            | 64         | 68                 | 68          |
| slide block to target       | 100           | 100      | -        | 100        | -          | -       | -       | 100         | 100         | 100           | 100        | 100                | 100         |
| reach and drag              | 100           | 96       | 96       | 100        | 100        | 52      | 100     | 96          | 96          | 96            | 60         | 100                | 96          |
| put money in safe           | 56            | 80       | 4        | 60         | 64         | 68      | -       | 64          | 60          | 68            | 60         | 76                 | 68          |
| place wine at rack location | 88            | 80       | 92       | -          | 80         | 52      | 84      | 80          | 84          | 88            | 96         | 88                 | 88          |
| insert onto square peg      | 8             | 4        | 12       | -          | 28         | 16      | 12      | 16          | 0           | 16            | 0          | 8                  | 8           |
| stack cups                  | 72            | 68       | -        | 52         | -          | 36      | -       | 48          | 52          | 60            | 36         | 72                 | 56          |
| turn oven on                | 76            | 100      | -        | -          | -          | 56      | -       | 92          | 92          | 96            | 100        | 100                | 88          |
| straighten rope             | 80            | 64       | -        | 84         | -          | -       | -       | 64          | 72          | 68            | 24         | 60                 | 80          |
| setup chess                 | 20            | 0        | 4        | 16         | -          | 16      | -       | 16          | 24          | 24            | 12         | 8                  | 12          |
| scoop with spatula          | 84            | 56       | 96       | 80         | 88         | 96      | 60      | 16          | 88          | 96            | 56         | 88                 | 88          |
| average                     | 64.2          | 61.0     | 53.0     | 67.6       | 54.2       | 54.3    | 51.5    | 59.0        | 63.2        | 63.6          | 50.0       | 64.0               | 63.4        |

Table E: All results on Colosseum benchmark.

robot arm states are recorded, including end-effector position, joint positions, and joint velocities. For each task, we collect 30 human demonstrations to train the model.

**Keyframe Discovery.** Following the approach of PerAct [6], we use heuristic rules to identify keyframes from the collected demonstrations. A frame is considered a keyframe if: 1) The joint velocities are near zero, and 2) The gripper open state has not changed.

**Execution.** For robot control and motion planning, we use the Franka ROS and MoveIt with RRT-Connect as default planner.

## D Detailed Results

We present the detailed results of all tasks in Tab. E and Tab. F.

## E Visualizations

In Fig. C and Fig. E, we present the results of target view augmentation in both the simulator and real-world environments. Fig. B and Fig. D showcase the rendering results in the simulator and real-world settings, respectively.

## F Additional Qualitative Analysis

In the supplementary materials, we provide episode rollouts of several representative tasks in the simulator and real-world demos in the attached videos.

| Method                              | RVT | MoCov3 | MAE | DINOv2 | CLIP | EVA | InternViT | MVP | VC-1 | SPA | DynaRend |
|-------------------------------------|-----|--------|-----|--------|------|-----|-----------|-----|------|-----|----------|
| <i>Group 1</i>                      |     |        |     |        |      |     |           |     |      |     |          |
| basket ball in hoop                 | 100 | 100    | 100 | 100    | 100  | 100 | 100       | 100 | 100  | 100 | 100      |
| put rubbish in bin                  | 96  | 100    | 100 | 96     | 96   | 96  | 100       | 96  | 100  | 100 | 100      |
| meat off grill                      | 100 | 100    | 100 | 100    | 100  | 100 | 100       | 100 | 100  | 100 | 100      |
| meat on grill                       | 88  | 80     | 76  | 76     | 68   | 80  | 72        | 68  | 76   | 80  | 92       |
| slide block to target               | 8   | 0      | 84  | 96     | 24   | 4   | 0         | 100 | 100  | 4   | 100      |
| reach and drag                      | 100 | 100    | 96  | 88     | 100  | 96  | 100       | 96  | 100  | 100 | 100      |
| take frame off hanger               | 96  | 88     | 88  | 92     | 88   | 84  | 84        | 88  | 88   | 96  | 96       |
| water plants                        | 48  | 64     | 60  | 28     | 64   | 60  | 44        | 52  | 60   | 68  | 56       |
| hang frame on hanger                | 0   | 8      | 4   | 0      | 4    | 8   | 8         | 12  | 4    | 4   | 24       |
| wipe desk                           | 0   | 0      | 0   | 0      | 0    | 0   | 0         | 0   | 0    | 0   | 0        |
| stack blocks                        | 56  | 60     | 72  | 72     | 68   | 56  | 60        | 84  | 68   | 68  | 80       |
| reach target                        | 96  | 60     | 96  | 88     | 100  | 96  | 80        | 92  | 96   | 92  | 100      |
| push button                         | 92  | 100    | 100 | 100    | 100  | 100 | 100       | 100 | 100  | 100 | 100      |
| lamp on                             | 60  | 88     | 68  | 84     | 88   | 52  | 80        | 28  | 88   | 64  | 100      |
| toilet seat down                    | 100 | 100    | 100 | 100    | 100  | 100 | 100       | 96  | 96   | 100 | 96       |
| close laptop lid                    | 84  | 96     | 96  | 96     | 96   | 84  | 80        | 80  | 96   | 100 | 96       |
| open drwaer                         | 92  | 88     | 96  | 92     | 100  | 88  | 88        | 92  | 96   | 96  | 96       |
| pick up cup                         | 88  | 92     | 92  | 88     | 96   | 96  | 88        | 96  | 96   | 96  | 96       |
| turn tap                            | 88  | 88     | 84  | 84     | 96   | 88  | 92        | 96  | 100  | 100 | 96       |
| take usb out of computer            | 100 | 100    | 100 | 100    | 100  | 100 | 100       | 100 | 88   | 100 | 92       |
| play jenga                          | 100 | 96     | 96  | 96     | 100  | 96  | 100       | 96  | 96   | 96  | 100      |
| insert onto square peg              | 8   | 28     | 84  | 80     | 44   | 88  | 40        | 64  | 92   | 84  | 24       |
| take umbrella out of umbrella stand | 92  | 92     | 100 | 100    | 92   | 100 | 96        | 100 | 100  | 100 | 100      |
| insert usb in computer              | 8   | 12     | 20  | 20     | 24   | 24  | 20        | 16  | 8    | 64  | 12       |
| straighten rope                     | 56  | 56     | 44  | 72     | 80   | 48  | 72        | 52  | 60   | 84  | 56       |
| turn oven on                        | 92  | 96     | 96  | 96     | 96   | 96  | 96        | 100 | 100  | 100 | 96       |
| change clock                        | 64  | 64     | 68  | 48     | 68   | 64  | 72        | 64  | 60   | 68  | 68       |
| close microwave                     | 100 | 100    | 100 | 100    | 100  | 100 | 100       | 100 | 100  | 100 | 100      |
| close fridge                        | 92  | 80     | 92  | 92     | 88   | 92  | 96        | 88  | 92   | 100 | 96       |
| close grill                         | 92  | 96     | 96  | 96     | 96   | 96  | 96        | 100 | 100  | 96  | 96       |
| open grill                          | 76  | 100    | 100 | 100    | 100  | 100 | 100       | 96  | 100  | 100 | 96       |
| unplug charger                      | 48  | 44     | 32  | 48     | 36   | 48  | 40        | 40  | 44   | 44  | 96       |
| press switch                        | 84  | 92     | 92  | 88     | 72   | 76  | 84        | 76  | 88   | 92  | 76       |
| take money out safe                 | 80  | 100    | 96  | 100    | 100  | 100 | 100       | 100 | 100  | 100 | 100      |
| <i>Group 2</i>                      |     |        |     |        |      |     |           |     |      |     |          |
| change channel                      | 0   | 0      | 8   | 4      | 0    | 0   | 4         | 0   | 0    | 4   | 100      |
| tv on                               | 0   | 4      | 8   | 0      | 4    | 4   | 8         | 4   | 4    | 8   | 100      |
| push buttons                        | 0   | 12     | 4   | 4      | 0    | 0   | 0         | 0   | 12   | 4   | 96       |
| stack wine                          | 12  | 12     | 16  | 40     | 4    | 12  | 0         | 28  | 8    | 28  | 20       |
| scoop with spatula                  | 0   | 0      | 0   | 0      | 0    | 0   | 0         | 0   | 0    | 0   | 92       |
| place hanger on rack                | 0   | 0      | 0   | 0      | 0    | 0   | 0         | 0   | 0    | 0   | 100      |
| move hanger                         | 72  | 0      | 0   | 0      | 0    | 0   | 0         | 0   | 0    | 0   | 88       |
| sweep to dustpan                    | 48  | 92     | 96  | 96     | 96   | 92  | 100       | 100 | 88   | 96  | 100      |
| take plate off colored dish rack    | 92  | 96     | 100 | 96     | 92   | 84  | 96        | 88  | 92   | 96  | 84       |
| screw nail                          | 32  | 52     | 36  | 36     | 36   | 36  | 52        | 32  | 32   | 48  | 56       |
| take shoes out of box               | 4   | 20     | 28  | 24     | 36   | 40  | 12        | 32  | 36   | 36  | 8        |
| slide cabinet open and place cups   | 0   | 0      | 0   | 0      | 0    | 0   | 4         | 0   | 0    | 4   | 0        |
| lamp off                            | 96  | 100    | 96  | 96     | 100  | 96  | 96        | 100 | 100  | 100 | 100      |
| pick and lift                       | 72  | 88     | 96  | 92     | 96   | 92  | 80        | 96  | 96   | 96  | 88       |
| take lid off saucepan               | 100 | 100    | 100 | 100    | 100  | 100 | 100       | 100 | 100  | 100 | 100      |
| close drawer                        | 100 | 100    | 100 | 100    | 100  | 96  | 100       | 100 | 100  | 100 | 100      |
| close box                           | 96  | 92     | 92  | 96     | 96   | 100 | 96        | 100 | 96   | 100 | 88       |
| phone on base                       | 100 | 100    | 100 | 100    | 100  | 100 | 96        | 100 | 100  | 100 | 100      |
| toilet seat up                      | 72  | 80     | 88  | 100    | 88   | 88  | 80        | 88  | 92   | 96  | 24       |
| put books on bookshelf              | 28  | 12     | 24  | 24     | 28   | 28  | 20        | 20  | 28   | 16  | 28       |
| beat the buzz                       | 88  | 88     | 92  | 96     | 88   | 92  | 84        | 88  | 88   | 100 | 100      |
| stack cups                          | 24  | 40     | 56  | 52     | 52   | 48  | 56        | 64  | 68   | 64  | 68       |
| put knife on chopping board         | 80  | 72     | 76  | 68     | 72   | 80  | 88        | 80  | 76   | 80  | 72       |
| place shape in shape sorter         | 12  | 20     | 36  | 32     | 28   | 36  | 20        | 44  | 36   | 56  | 48       |
| take toilet roll off stand          | 100 | 100    | 92  | 76     | 96   | 92  | 88        | 84  | 92   | 96  | 84       |
| put umbrella in umbrella stand      | 20  | 8      | 0   | 12     | 12   | 0   | 4         | 12  | 8    | 12  | 12       |
| setup checkers                      | 44  | 76     | 80  | 68     | 68   | 88  | 92        | 92  | 80   | 80  | 92       |
| open window                         | 92  | 96     | 96  | 100    | 100  | 96  | 100       | 96  | 100  | 100 | 92       |
| open wine bottle                    | 96  | 80     | 100 | 88     | 92   | 92  | 88        | 96  | 88   | 88  | 100      |
| open microwave                      | 72  | 100    | 100 | 88     | 96   | 100 | 80        | 96  | 100  | 100 | 84       |
| put money in safe                   | 100 | 96     | 100 | 88     | 92   | 100 | 96        | 100 | 100  | 100 | 96       |
| open door                           | 88  | 100    | 96  | 96     | 96   | 96  | 96        | 84  | 96   | 96  | 92       |
| close door                          | 12  | 32     | 68  | 56     | 60   | 80  | 20        | 24  | 20   | 60  | 0        |
| open fridge                         | 24  | 44     | 52  | 48     | 44   | 36  | 64        | 52  | 32   | 64  | 68       |
| open oven                           | 0   | 8      | 4   | 12     | 8    | 4   | 20        | 4   | 4    | 16  | 80       |
| plug charger in power supply        | 40  | 32     | 36  | 32     | 24   | 44  | 36        | 24  | 32   | 60  | 28       |

Table F: All results on 71 RL Bench tasks.



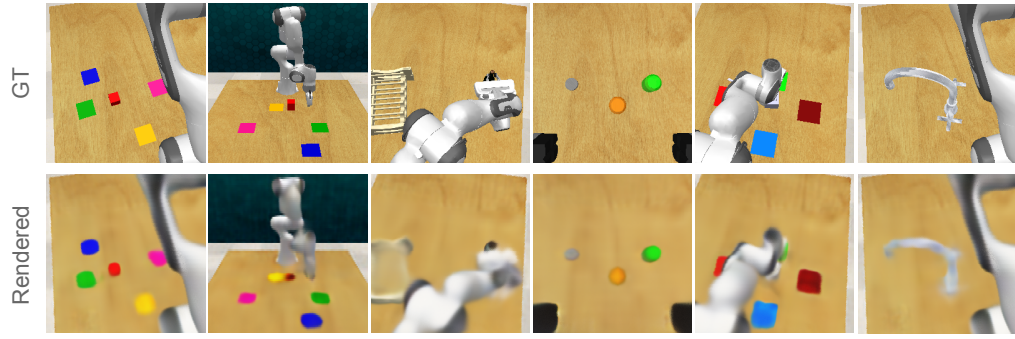

Figure B: Visualization of rendered results in simulation.

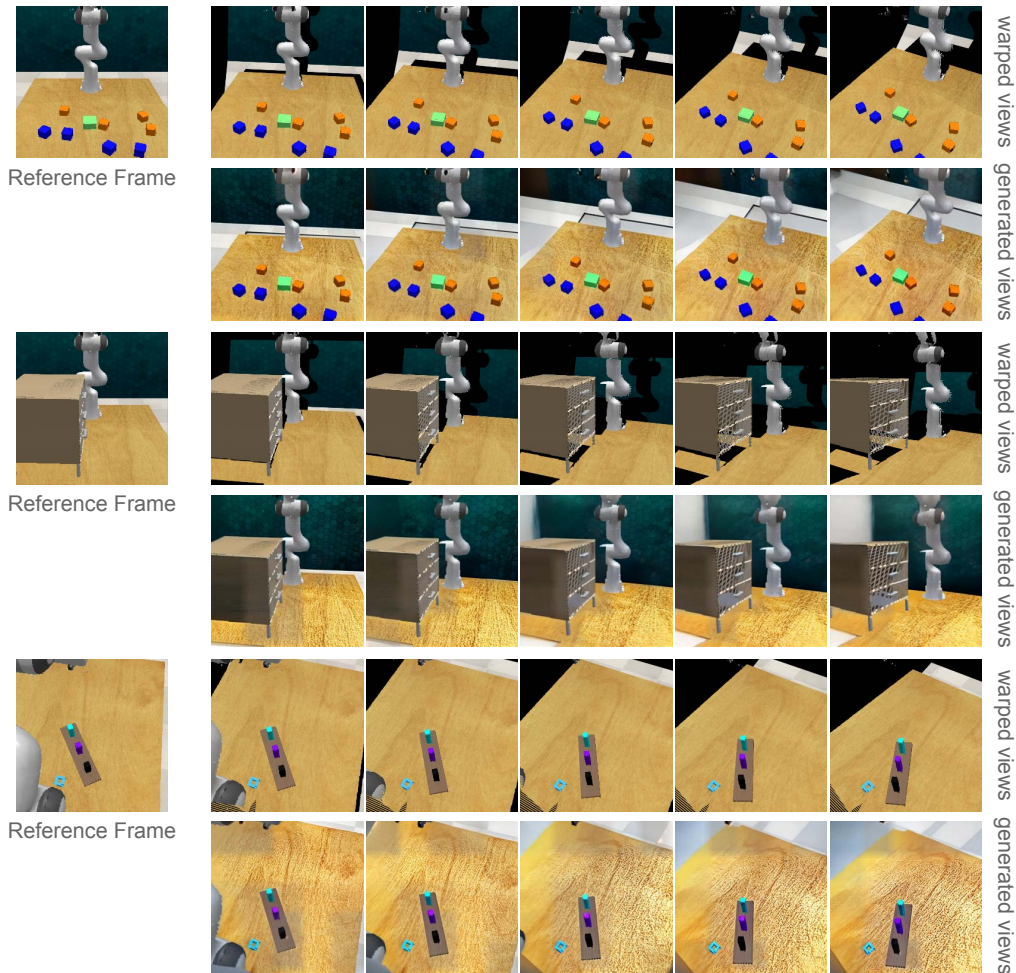

Figure C: Visualization of target view synthesis in simulation.

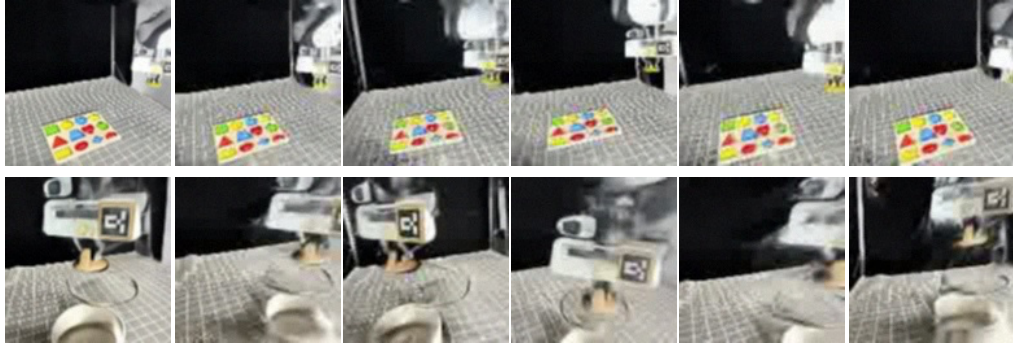

Figure D: Visualization of rendered results in the real world.

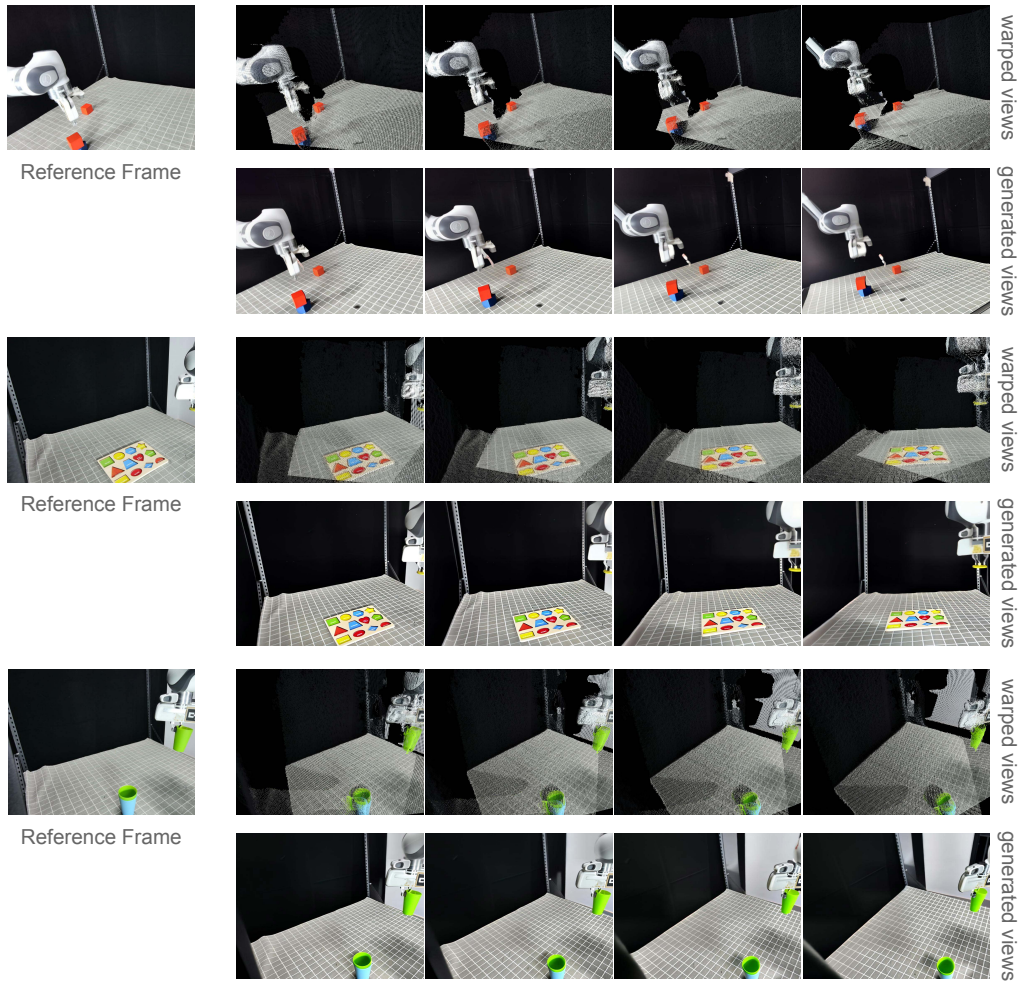

Figure E: Visualization of target view synthesis in the real world.

## References

- [1] Goyal, A., Blukis, V., Xu, J., Guo, Y., Chao, Y.W., Fox, D., 2024. Rvt-2: Learning precise manipulation from few demonstrations. arXiv preprint arXiv:2406.08545 .
- [2] Henry, A., Dachapally, P.R., Pawar, S., Chen, Y., 2020. Query-key normalization for transformers. arXiv preprint arXiv:2010.04245 .
- [3] Ma, B., Gao, H., Deng, H., Luo, Z., Huang, T., Tang, L., Wang, X., 2024. You see it, you got it: Learning 3d creation on pose-free videos at scale. arXiv preprint arXiv:2412.06699 .
- [4] Pumacay, W., Singh, I., Duan, J., Krishna, R., Thomason, J., Fox, D., 2024. The colosseum: A benchmark for evaluating generalization for robotic manipulation, in: RSS 2024 Workshop: Data Generation for Robotics.
- [5] Shazeer, N., 2020. Glu variants improve transformer. arXiv preprint arXiv:2002.05202 .
- [6] Shridhar, M., Manuelli, L., Fox, D., 2023. Perceiver-actor: A multi-task transformer for robotic manipulation, in: Conference on Robot Learning, PMLR. pp. 785–799.
- [7] Su, J., Ahmed, M., Lu, Y., Pan, S., Bo, W., Liu, Y., 2024. Roformer: Enhanced transformer with rotary position embedding. Neurocomputing 568, 127063.
- [8] Wang, P., Bai, S., Tan, S., Wang, S., Fan, Z., Bai, J., Chen, K., Liu, X., Wang, J., Ge, W., et al., 2024. Qwen2-vl: Enhancing vision-language model’s perception of the world at any resolution. arXiv preprint arXiv:2409.12191 .
- [9] Ze, Y., Yan, G., Wu, Y.H., Macaluso, A., Ge, Y., Ye, J., Hansen, N., Li, L.E., Wang, X., 2023. Gnfactor: Multi-task real robot learning with generalizable neural feature fields, in: Conference on Robot Learning, PMLR. pp. 284–301.
- [10] Zhu, H., Yang, H., Wang, Y., Yang, J., Wang, L., He, T., 2024. Spa: 3d spatial-awareness enables effective embodied representation. arXiv preprint arXiv:2410.08208 .
